# Supplementary material for: Graph theoretic visualization of patient and health worker messaging in the EHR
Source: Front Artif Intell. 2024 Dec 3;7:1422208. doi: 10.3389/frai.2024.1422208 (PMC11651085; doi:10.3389/frai.2024.1422208)
Supplement: Supplementary file 1 [file Table_1.xlsx]

## Sheet: Sheet1
Position	Provider Classification
Nurse Practitioner w Rx Hem-Med Oncol v2	Non-Physician Practitioners
Nurse Practitioner w Rx Neurosurgery	Non-Physician Practitioners
Nurse Practitioner w Rx Transplant	Non-Physician Practitioners
Physicians Assistant Surgical Oncology	Non-Physician Practitioners
Physicians Assistant ENT	Non-Physician Practitioners
Physicians Assistant Hem-Med Oncology v2	Non-Physician Practitioners
Physicians Assistant General Surgery	Non-Physician Practitioners
Nurse Practitioner wo Rx Orthopaedic	Non-Physician Practitioners
Physicians Assistant Hem-Med Oncology	Non-Physician Practitioners
Nurse Practitioner w Rx CT Surgery	Non-Physician Practitioners
Physicians Assistant GIM-Family Med	Non-Physician Practitioners
Physicians Assistant	Non-Physician Practitioners
Physicians Assistant Cardiology	Non-Physician Practitioners
Nurse Practitioner w Rx Neurology	Non-Physician Practitioners
Physicians Assistant Neurosurgery	Non-Physician Practitioners
Nurse Practitioner w Rx Cardiology	Non-Physician Practitioners
Nurse Practitioner wo Rx Neurology	Non-Physician Practitioners
Nurse Practitioner w Rx Rad Onc	Non-Physician Practitioners
Nurse Practitioner and Quality NonMDTeam	Non-Physician Practitioners
Nurse Practitioner w Rx GIM-Family Med	Non-Physician Practitioners
Nurse Practitioner wo Rx Cardiology	Non-Physician Practitioners
Nurse Practitioner w RX ENT	Non-Physician Practitioners
Nurse Practitioner wo Rx Vascular Surger	Non-Physician Practitioners
Physicians Assistant Gastroenterology	Non-Physician Practitioners
Physicians Assistant Interventional Radi	Non-Physician Practitioners
Physicians Assistant Urology	Non-Physician Practitioners
Nurse Practitioner wo Rx Hem-Med Onc v2	Non-Physician Practitioners
Nurse Practitioner w RX General Surgery	Non-Physician Practitioners
Nurse Practitioner w Rx Psychology	Non-Physician Practitioners
Nurse Practitioner wo Rx Rad Onc	Non-Physician Practitioners
Nurse Practitioner w Rx Urology	Non-Physician Practitioners
Nurse Practitioner wo Rx Pulmonology	Non-Physician Practitioners
Physicians Assistant Orthopaedic	Non-Physician Practitioners
Nurse Practitioner w Rx Pulmonology	Non-Physician Practitioners
Nurse Practitioner wo Rx Genetics	Non-Physician Practitioners
Physicians Assistant Pulmonology	Non-Physician Practitioners
Physicians Assistant Hospital Medicine	Non-Physician Practitioners
Nurse Practitioner w Rx Endocrinology	Non-Physician Practitioners
Nurse Practitioner wo Rx Interventional	Non-Physician Practitioners
Physicians Assistant Transplant	Non-Physician Practitioners
Physicians Assistant Dermatology	Non-Physician Practitioners
Nurse Practitioner w Rx Gastroenterology	Non-Physician Practitioners
Nurse Practitioner w RX Nephrology	Non-Physician Practitioners
Nurse Practitioner w Rx Sleep Center	Non-Physician Practitioners
Nurse Practitioner w Rx Orthopaedic	Non-Physician Practitioners
Nurse Practitioner w Rx Gerontology	Non-Physician Practitioners
Physicians Assistant CT Surgery	Non-Physician Practitioners
Nurse Practitioner wo Rx CT Surgery	Non-Physician Practitioners
Nurse Practitioner wo Rx Transplant	Non-Physician Practitioners
Nurse Practitioner w Rx Emergency Medicine	Non-Physician Practitioners
Nurse Practitioner wo Rx GYNOB	Non-Physician Practitioners
Nurse Practitioner w Rx Palliative Care	Non-Physician Practitioners
Physicians Assistant Infectious Disease	Non-Physician Practitioners
Nurse Practitioner w Rx Hospital Medicin	Non-Physician Practitioners
Nurse Practitioner wo Rx Urology	Non-Physician Practitioners
Physicians Assistant Vascular Surgery	Non-Physician Practitioners
Physicians Assistant Emergency Medicine	Non-Physician Practitioners
Nurse Practitioner wo Rx Neurosurgery	Non-Physician Practitioners
Physicians Assistant GYNOB	Non-Physician Practitioners
Nurse Practitioner wo Rx Hospital Medici	Non-Physician Practitioners
Nurse Practitioner wo Rx Rehab	Non-Physician Practitioners
Physicians Assistant Palliative Care	Non-Physician Practitioners
Nurse Practitioner wo RX Nephrology	Non-Physician Practitioners
Nurse Practitioner wo Rx Sleep Center	Non-Physician Practitioners
Nurse Practitioner wo Rx Hem-Med Oncolog	Non-Physician Practitioners
Nurse Practitioner wo Rx Gastroenterolog	Non-Physician Practitioners
Nurse Practitioner w Rx GYNOB	Non-Physician Practitioners
ED Staff Nurse	Nurses/CNA/MA
Staff Nurse Hospital Billing	Nurses/CNA/MA
Staff Nurse Hospital	Nurses/CNA/MA
Staff Nurse TEC	Nurses/CNA/MA
Care Manager Nurse	Nurses/CNA/MA
Cardiology Staff (Tech, Nurse, Mgmt, Scheduler)	Nurses/CNA/MA
Nurse Tech	Nurses/CNA/MA
Staff Nurse Hospital Radiology	Nurses/CNA/MA
Staff Nurse Infusion TEC	Nurses/CNA/MA
Staff Nurse TEC GYNOB	Nurses/CNA/MA
Outpatient Transplant Staff (Nurse, Clerical)	Nurses/CNA/MA
Staff Nurse Pilot TEC	Nurses/CNA/MA
Hyperbaric Nurse	Nurses/CNA/MA
ED Nurse Tech	Nurses/CNA/MA
Staff Nurse Hospital ESP	Nurses/CNA/MA
Dialysis Staff (Nurse, Clerical)	Nurses/CNA/MA
WOC Nurse	Nurses/CNA/MA
Neurodiagnostic Staff (Clerical, Nurse, Mgmt)	Nurses/CNA/MA
Physician Endocrinology	Physicians
Physician GIM-Family Med	Physicians
Physician	Physicians
Physician Cardiology	Physicians
Physician Infectious Disease	Physicians
Physician General Surgery	Physicians
Physician Psychology	Physicians
Physician Hem-Med Oncology v2	Physicians
Physician Sleep Center	Physicians
Physician Dermatology	Physicians
Resident Surgical	Physicians
Physician Surgical Oncology	Physicians
Physician Pulmonology	Physicians
Physician Gastroenterology	Physicians
Physician Rad Onc	Physicians
Physician Rheumatology	Physicians
Physician Genetics	Physicians
Physician Nephrology	Physicians
Resident GYNOB	Physicians
Physician GYNOB	Physicians
Physician Transplant	Physicians
Physician Neurology	Physicians
Resident	Physicians
Physician Orthopaedic	Physicians
Physician JOC	Physicians
Resident Medicine	Physicians
Physician Vascular Surgery	Physicians
Resident Results Route to Resident	Physicians
Physician ENT	Physicians
Physician Pain Management	Physicians
Physician Palliative Care	Physicians
Physician Rehab	Physicians
Physician Neurosurgery	Physicians
Physician Interventional Radiology	Physicians
Physician Gerontology	Physicians
Physician Urology	Physicians
Physician CT Surgery	Physicians
Physician GYNOB Oncology	Physicians
Physician Plastic Surgery	Physicians
Physician Hospital Medicine	Physicians
Resident Imaging	Physicians
Physician Oral Surgery	Physicians
Cardiology Physician	Physicians
Physician Inpatient	Physicians
Resident Oncology w Chemo	Physicians
Resident Psych	Physicians
Resident Oncology	Physicians
No Access	Support Staff
Medical Student, Midlevel Provider Student	Support Staff
Ancillary Clinical Support Billing	Support Staff
EeMR View Only	Support Staff
Reviewer (NonStaff)	Support Staff
Athletic Trainer	Support Staff
Not Recorded	Support Staff
Pharmacist	Support Staff
TEC Admin Support	Support Staff
Surg Procurement	Support Staff
Medical Assistant	Support Staff
Ancillary Clinical Support	Support Staff
Nutritional Support Staff	Support Staff
AA Advanced Build	Support Staff
IS Support	Support Staff
Patient Educator	Support Staff
Lab Tech BB	Support Staff
Lab Mgr Sup Director	Support Staff
Pharmacy Student	Support Staff
Rad Supervisor	Support Staff
zzLaboratory	Support Staff
HIM Operations Staff	Support Staff
Radiology Tech	Support Staff
Rad Transporter	Support Staff
Business Office Staff	Support Staff
Patient Care Assistant	Support Staff
Clinical Nutritionist (F&N Staff)	Support Staff
Social Services Staff	Support Staff
Utilization Review	Support Staff
Medical Assistant Infusion	Support Staff
Bed Control	Support Staff
APP Student	Support Staff
Rehab Staff (Tech, Therapist, Clerical)	Support Staff
Pharmacy Technician	Support Staff
Unit Clerk	Support Staff
Care Manager	Support Staff
Respiratory Staff (Tech, Therapist, Clerical)	Support Staff
Lab Support Staff	Support Staff
Ancillary Clinical Support Billing Psych	Support Staff
Medical Assistant GYNOB	Support Staff
Care Manager Administrator	Support Staff
Radiologist	Support Staff
Lab Pathologist	Support Staff
Surg Admin	Support Staff
Surg Staff	Support Staff
Rad Film Librarian	Support Staff
ED Provider	Support Staff
Imaging Workflow Admin	Support Staff
Rad Scheduler	Support Staff
